# Supplementary material
Source: Royal Society of Chemistry journal article supplement (https://www.rsc.org/suppdata/dt/1999/2293/902915j.doc)
Supplement: Supplementary file 1 [file 902915j.doc]

**The synthesis of C[Si(CH3)2X]3SiX3 compounds (X = H, Cl, Br and OH) and the molecular structure of C[Si(CH3)2H]3SiH3 in the gas phase; a study by electron diffraction and *ab initio* molecular orbital calculations**

Carole A. Morrison, David W.H. Rankin* and Heather E. Robertson

*Department of Chemistry, University of Edinburgh, West Mains Road, Edinburgh, EH9 3JJ, UK*

Paul D. Lickiss and Phindile C. Masangane

Chemistry Department, Imperial College of Science, Technology and Medicine, London SW7 2AY, UK

**Electronic supplement**

**Model used in analysis of GED data for the 11 conformers of C[Si(CH3)2H]3SiH3**

*Methyl groups*. All methyl groups in all eleven conformers were assumed to be identical and to possess local C3v symmetry, thus requiring only two geometric parameters for their description: *r*C-H (*p*1) and the angle Si-C-H (*p*2). In light of the *ab* *initio* calculations all methyl groups were assumed to be perfectly staggered with respect to the branch hydrogens H(4), H(14) and H(24).

*Si(2,3,13,23) branches*. On the basis of geometries calculated *ab initio* the conformers were assumed to possess only three different Si-C distances. These were assigned to be the silyl *r*Si(2)-C(1), middle *r*Si(3,13 or 23)-C(1) and branch *r*Si-C(methyl) distances (see Figure 3 for atom numbering). These were described by three geometric parameters, namely the average Si-C distance (*p*3), difference *r*Si-C [middle - average (branch + silyl)] (*p*4) and difference *r*Si-C (branch - silyl) (*p*5), so defined in order to retrieve maximum information from the GED data. The third assumption made was that only two different Si-H distances existed in all six conformers (*i.e.* those in the SiH3 groups and those in the Si(CH3)H groups). These were defined by the average, *p*6, and the difference, *p*7. One parameter (*p*8) was used to describe all 66 C(1)-Si-C branch angles [*e.g.* <C(1)Si(3)C(5 or 6) *etc*.] and one parameter (*p*9) to define all 33 C(1)-Si-H branch angles. Calculated values for both parameters fell over a range of just 2 (see Table 1), justifying the use of one parameter in each case. The last parameter required to define the Si(CH3)2H branch motif is the H-Si-C branch angle, which describes the separation between the branch H and the two CH3 groups. This was achieved using one parameter (*p*10) for all branches in all conformers.

The next set of parameters required to define the location of the branch substituents are the angles Si(2)-C(1)-Si(3), Si(2)-C(1)-Si(13) and Si(2)-C(1)-Si(23). Calculated values fell over a range of *ca.* 4, too large a range to be accommodated with only one parameter. To allow some extra flexibility without generating too many new parameters, three parameters [corresponding to Si(2)-C(1)-Si angles to branches of type ‘a’, ‘b’ and ‘c’] were incorporated into the conformer model-files. This had the effect that it was now possible to model all Si(2)-C(1)-Si angles with just three parameters to with a mean deviation of just 2 from the calculated values. These angles were described by the overall average Si(2)-C(1)-Si angle (*p*11), the difference between the Si(2)-C(1)-Si angle type ‘a’ minus the average of angle types ‘b’ and ‘c’ (*p*12), and finally the difference between angle types ‘b’ and ‘c’ (*p*13).

Each branch requires a dihedral angle *i.e*. Si(2)-C(1)-Si(3)-H(4), Si(2)-C(1)-Si(13)-H(14) or Si(2)-C(1)-Si(23)-H(24). Three torsional parameters were incorporated for each conformer of C1 symmetry and one for each with C3 symmetry (see Table 4).

*Separating the SiH(CH3)2 branches.* From the *ab initio* calculations the Si-C(1)-Si angles separating the three branches in the eleven conformers were found to vary by as much as 8. However, on close inspection a strong correlation was observed between the angle value and similar branch types in the different conformers. Note only two torsional angles will be required to define the positions of the three branches, as a Si(2)-C(1)-Si angle has already been defined for each branch. Thus only seven angles separating branches ‘a, b and c’ will be required instead of nine. With reference to Figure 2 (where the different branch types are clearly marked), moving in an anticlockwise rotation, it is possible to define all eleven conformers using just seven different Si-C(1)-Si angles, corresponding to angles between branches of types (i) ‘a’ and ‘a’, (ii) ‘a’ and ‘b’, (iii) ‘a’ and ‘c’, (iv) ‘b’ and ‘b’, (vi) ‘b’ and ‘c’, (vi) ‘c’ and ‘b’, and finally (vii) ‘c’ and ‘c’. Thus instead of having to define 22 Si-C(1)-Si branch separating angles, only seven were required to impart sufficient flexibility to the modelsystem, allowing all calculated Si-C(1)-Si angles to be modelled with a mean deviation less than 2. These angles were then defined by a set of seven parameters, comprising one overall average angle (*p*14) and six describing differences the between individual angle values (*p*15-20). (See Table 4 for definitions.)

*SiH3 group*. The SiH3 group was assumed to be identical in all 11 conformers and to have local C3v symmetry. After the generation of the Si-H distance (by parameters 6 and 7) only two further parameters were required to describe the unit, namely angle <C(1)Si(2)H (*p*21) and the dihedral HSi(2)C(1)Si(3) (*p*22).

**Table 1** Full coordinates (*r*a/Å) derived from SARACEN analysis of GED data for the eleven conformers of C[Si(CH3)2H]3SiH3

| Atom no. | x | y | z |
| --- | --- | --- | --- |
| ‘acb’ |  |  |  |
| C1 | 0.0000 | 0.0000 | -1.8926 |
| Si2 | 0.0000 | 0.0000 | 0.0000 |
| Si3 | 1.7910 | 0.0000 | -2.4723 |
| H4 | 1.7671 | -0.3660 | -3.9343 |
| C5 | 2.6281 | 1.6751 | -2.3341 |
| C6 | 2.8654 | -1.2696 | -1.6008 |
| H7 | 3.6563 | 1.6034 | -2.6844 |
| H8 | 2.0944 | 2.4050 | -2.9404 |
| H9 | 2.6266 | 2.0035 | -1.2962 |
| H10 | 3.8835 | -1.2153 | -1.9825 |
| H11 | 2.8745 | -1.0724 | -0.5303 |
| H12 | 2.4711 | -2.2690 | -1.7765 |
| Si13 | -0.7816 | -1.6216 | -2.4432 |
| H14 | 0.2697 | -2.6864 | -2.2614 |
| C15 | -2.2681 | -2.1295 | -1.4146 |
| C16 | -1.2825 | -1.6409 | -4.2528 |
| H17 | -2.6689 | -3.0712 | -1.7858 |
| H18 | -1.9718 | -2.2529 | -0.3743 |
| H19 | -3.0392 | -1.3637 | -1.4778 |
| H20 | -1.7254 | -2.6035 | -4.5025 |
| H21 | -2.0097 | -0.8533 | -4.4424 |
| H22 | -0.4074 | -1.4773 | -4.8793 |
| Si23 | -0.9549 | 1.5418 | -2.3974 |
| H24 | -0.4779 | 2.6535 | -1.4982 |
| C25 | -0.6322 | 2.0830 | -4.1662 |
| C26 | -2.8109 | 1.3917 | -2.1561 |
| H27 | -1.2133 | 2.9758 | -4.3905 |
| H28 | 0.4259 | 2.3034 | -4.2971 |
| H29 | -0.9190 | 1.2884 | -4.8530 |
| H30 | -3.2988 | 2.3142 | -2.4664 |
| H31 | -3.1948 | 0.5664 | -2.7533 |
| H32 | -3.0324 | 1.2062 | -1.1065 |
| H33 | 0.2348 | -1.3963 | 0.4871 |
| H34 | 1.0918 | 0.9015 | 0.4871 |
| H35 | -1.3266 | 0.4948 | 0.4871 |
| ‘aca’ |  |  |  |
| C36 | 0.0000 | 0.0000 | -1.8926 |
| Si37 | 0.0000 | 0.0000 | 0.0000 |
| Si38 | -0.8599 | -1.5711 | -2.4723 |
| H39 | -1.3262 | -1.3082 | -3.8814 |
| C40 | 0.2694 | -3.0700 | -2.5331 |
| C41 | -2.3776 | -2.0170 | -1.4606 |
| H42 | -0.2898 | -3.9393 | -2.8749 |
| H43 | 1.0935 | -2.8831 | -3.2195 |
| H44 | 0.6697 | -3.2705 | -1.5408 |
| H45 | -2.8235 | -2.9313 | -1.8483 |
| H46 | -2.0952 | -2.1706 | -0.4205 |
| H47 | -3.1079 | -1.2117 | -1.5171 |
| Si48 | -1.0472 | 1.4642 | -2.4432 |
| H49 | -0.6748 | 1.7408 | -3.8774 |
| C50 | -2.8940 | 1.1268 | -2.4057 |
| C51 | -0.7153 | 3.0363 | -1.4715 |
| H52 | -3.4371 | 2.0111 | -2.7344 |
| H53 | -3.1304 | 0.2958 | -3.0680 |
| H54 | -3.2021 | 0.8746 | -1.3924 |
| H55 | -1.3516 | 3.8389 | -1.8403 |
| H56 | -0.9264 | 2.8692 | -0.4167 |
| H57 | 0.3277 | 3.3267 | -1.5853 |
| Si58 | 1.7910 | 0.0000 | -2.4723 |
| H59 | 2.3017 | 1.4054 | -2.2825 |
| C60 | 2.9063 | -1.1341 | -1.4745 |
| C61 | 1.9950 | -0.4228 | -4.2903 |
| H62 | 3.9227 | -1.0856 | -1.8616 |
| H63 | 2.9067 | -0.8256 | -0.4305 |
| H64 | 2.5464 | -2.1593 | -1.5437 |
| H65 | 3.0503 | -0.4047 | -4.5569 |
| H66 | 1.5945 | -1.4162 | -4.4850 |
| H67 | 1.4602 | 0.3035 | -4.9000 |
| H68 | 0.2348 | -1.3963 | 0.4871 |
| H69 | 1.0918 | 0.9015 | 0.4871 |
| H70 | -1.3266 | 0.4948 | 0.4871 |
| ‘bbc’ |  |  |  |
| C71 | 0.0000 | 0.0000 | -1.8926 |
| Si72 | 0.0000 | 0.0000 | 0.0000 |
| Si73 | -1.0690 | 1.4484 | -2.4432 |
| H74 | -2.5015 | 1.0089 | -2.2797 |
| C75 | -0.8409 | 2.9930 | -1.4002 |
| C76 | -0.8352 | 1.9151 | -4.2469 |
| H77 | -1.4858 | 3.7874 | -1.7720 |
| H78 | -1.0983 | 2.7796 | -0.3642 |
| H79 | 0.1957 | 3.3218 | -1.4502 |
| H80 | -1.4803 | 2.7556 | -4.4968 |
| H81 | 0.2017 | 2.1959 | -4.4236 |
| H82 | -1.0892 | 1.0686 | -4.8826 |
| Si83 | 1.8136 | 0.0000 | -2.3974 |
| H84 | 2.5071 | -0.9927 | -1.4998 |
| C85 | 2.1034 | -0.5565 | -4.1672 |
| C86 | 2.6640 | 1.6562 | -2.1534 |
| H87 | 3.1685 | -0.5327 | -4.3913 |
| H88 | 1.7333 | -1.5716 | -4.2997 |
| H89 | 1.5793 | 0.1071 | -4.8528 |
| H90 | 3.7051 | 1.5853 | -2.4637 |
| H91 | 2.1648 | 2.4183 | -2.7493 |
| H92 | 2.6230 | 1.9404 | -1.1033 |
| Si93 | -0.8503 | -1.6019 | -2.3974 |
| H94 | -2.0134 | -1.7835 | -1.4559 |
| C95 | -1.5484 | -1.5680 | -4.1402 |
| C96 | 0.2413 | -3.1203 | -2.2289 |
| H97 | -2.0237 | -2.5211 | -4.3655 |
| H98 | -2.2860 | -0.7720 | -4.2265 |
| H99 | -0.7467 | -1.3910 | -4.8551 |
| H100 | -0.3106 | -4.0070 | -2.5361 |
| H101 | 1.1227 | -3.0124 | -2.8587 |
| H102 | 0.5547 | -3.2359 | -1.1928 |
| H103 | 0.2348 | -1.3963 | 0.4871 |
| H104 | 1.0918 | 0.9015 | 0.4871 |
| H105 | -1.3266 | 0.4948 | 0.4871 |
| ‘abb’ |  |  |  |
| C106 | 0.0000 | 0.0000 | -1.8926 |
| Si107 | 0.0000 | 0.0000 | 0.0000 |
| Si108 | 1.7910 | 0.0000 | -2.4723 |
| H109 | 1.7712 | -0.4127 | -3.9219 |
| C110 | 2.6107 | 1.6872 | -2.3878 |
| C111 | 2.8783 | -1.2300 | -1.5610 |
| H112 | 3.6397 | 1.6150 | -2.7358 |
| H113 | 2.0696 | 2.3919 | -3.0169 |
| H114 | 2.6056 | 2.0485 | -1.3609 |
| H115 | 3.8959 | -1.1774 | -1.9444 |
| H116 | 2.8851 | -0.9986 | -0.4972 |
| H117 | 2.4944 | -2.2386 | -1.7046 |
| Si118 | -0.8580 | -1.5978 | -2.3974 |
| H119 | -2.0583 | -1.7414 | -1.4970 |
| C120 | -1.4898 | -1.5880 | -4.1656 |
| C121 | 0.2006 | -3.1300 | -2.1581 |
| H122 | -1.9725 | -2.5377 | -4.3898 |
| H123 | -2.2100 | -0.7820 | -4.2952 |
| H124 | -0.6591 | -1.4386 | -4.8531 |
| H125 | -0.3544 | -4.0137 | -2.4682 |
| H126 | 1.1067 | -3.0493 | -2.7562 |
| H127 | 0.4731 | -3.2296 | -1.1088 |
| Si128 | -1.0090 | 1.5070 | -2.3974 |
| H129 | -0.5450 | 2.6443 | -1.5237 |
| C130 | -0.7394 | 2.0321 | -4.1799 |
| C131 | -2.8545 | 1.3079 | -2.1141 |
| H132 | -1.3504 | 2.9049 | -4.4035 |
| H133 | 0.3089 | 2.2804 | -4.3365 |
| H134 | -1.0179 | 1.2202 | -4.8496 |
| H135 | -3.3749 | 2.2117 | -2.4262 |
| H136 | -3.2272 | 0.4638 | -2.6918 |
| H137 | -3.0483 | 1.1310 | -1.0576 |
| H138 | 0.2348 | -1.3963 | 0.4871 |
| H139 | 1.0918 | 0.9015 | 0.4871 |
| H140 | -1.3266 | 0.4948 | 0.4871 |
| ‘abc’ |  |  |  |
| C141 | 0.0000 | 0.0000 | -1.8926 |
| Si142 | 0.0000 | 0.0000 | 0.0000 |
| Si143 | 1.7910 | 0.0000 | -2.4723 |
| H144 | 1.7753 | -0.4558 | -3.9090 |
| C145 | 2.5944 | 1.6968 | -2.4381 |
| C146 | 2.8900 | -1.1919 | -1.5249 |
| H147 | 3.6241 | 1.6241 | -2.7840 |
| H148 | 2.0467 | 2.3772 | -3.0879 |
| H149 | 2.5857 | 2.0884 | -1.4224 |
| H150 | 3.9070 | -1.1408 | -1.9099 |
| H151 | 2.8944 | -0.9289 | -0.4685 |
| H152 | 2.5158 | -2.2079 | -1.6384 |
| Si153 | -0.8580 | -1.5978 | -2.3974 |
| H154 | -2.0075 | -1.7863 | -1.4409 |
| C155 | -1.5808 | -1.5505 | -4.1298 |
| C156 | 0.2354 | -3.1177 | -2.2561 |
| H157 | -2.0596 | -2.5018 | -4.3555 |
| H158 | -2.3192 | -0.7537 | -4.1995 |
| H159 | -0.7893 | -1.3682 | -4.8546 |
| H160 | -0.3211 | -4.0019 | -2.5620 |
| H161 | 1.1078 | -3.0052 | -2.8975 |
| H162 | 0.5635 | -3.2413 | -1.2254 |
| Si163 | -1.0621 | 1.4535 | -2.4432 |
| H164 | -2.4966 | 1.0256 | -2.2672 |
| C165 | -0.8150 | 3.0018 | -1.4100 |
| C166 | -0.8376 | 1.9090 | -4.2509 |
| H167 | -1.4566 | 3.7991 | -1.7814 |
| H168 | -1.0666 | 2.7957 | -0.3711 |
| H169 | 0.2236 | 3.3225 | -1.4690 |
| H170 | -1.4782 | 2.7531 | -4.5007 |
| H171 | 0.2000 | 2.1811 | -4.4365 |
| H172 | -1.1025 | 1.0612 | -4.8804 |
| H173 | 0.2348 | -1.3963 | 0.4871 |
| H174 | 1.0918 | 0.9015 | 0.4871 |
| H175 | -1.3266 | 0.4948 | 0.4871 |
| ‘aaa’ |  |  |  |
| C176 | 0.0000 | 0.0000 | -1.8926 |
| Si177 | 0.0000 | 0.0000 | 0.0000 |
| Si178 | 1.7910 | 0.0000 | -2.4723 |
| H179 | 1.7829 | -0.5237 | -3.8857 |
| C180 | 2.5682 | 1.7086 | -2.5191 |
| C181 | 2.9079 | -1.1284 | -1.4698 |
| H182 | 3.5991 | 1.6355 | -2.8615 |
| H183 | 2.0103 | 2.3489 | -3.2002 |
| H184 | 2.5531 | 2.1479 | -1.5231 |
| H185 | 3.9241 | -1.0801 | -1.8571 |
| H186 | 2.9079 | -0.8155 | -0.4271 |
| H187 | 2.5494 | -2.1543 | -1.5347 |
| Si188 | -0.8599 | -1.5711 | -2.4723 |
| H189 | -1.3154 | -1.3125 | -3.8857 |
| C190 | 0.2658 | -3.0732 | -2.5191 |
| C191 | -2.3860 | -2.0090 | -1.4698 |
| H192 | -0.2933 | -3.9423 | -2.8615 |
| H193 | 1.0953 | -2.8912 | -3.2002 |
| H194 | 0.6584 | -3.2709 | -1.5231 |
| H195 | -2.8315 | -2.9237 | -1.8571 |
| H196 | -2.1115 | -2.1592 | -0.4271 |
| H197 | -3.1138 | -1.2020 | -1.5347 |
| Si198 | -0.9653 | 1.5086 | -2.4723 |
| H199 | -0.5198 | 1.7840 | -3.8857 |
| C200 | -2.8235 | 1.2423 | -2.5191 |
| C201 | -0.6168 | 3.0575 | -1.4698 |
| H202 | -3.3174 | 2.1500 | -2.8615 |
| H203 | -3.0620 | 0.4273 | -3.2002 |
| H204 | -3.1853 | 0.9928 | -1.5231 |
| H205 | -1.2052 | 3.8875 | -1.8571 |
| H206 | -0.8804 | 2.8889 | -0.4271 |
| H207 | 0.4405 | 3.3085 | -1.5347 |
| H208 | 0.2348 | -1.3963 | 0.4871 |
| H209 | 1.0918 | 0.9015 | 0.4871 |
| H210 | -1.3266 | 0.4948 | 0.4871 |
| ‘aab’ |  |  |  |
| C211 | 0.0000 | 0.0000 | -1.8926 |
| Si212 | 0.0000 | 0.0000 | 0.0000 |
| Si213 | 1.7910 | 0.0000 | -2.4723 |
| H214 | 1.7705 | -0.4059 | -3.9238 |
| C215 | 2.6133 | 1.6856 | -2.3800 |
| C216 | 2.8765 | -1.2359 | -1.5667 |
| H217 | 3.6421 | 1.6134 | -2.7283 |
| H218 | 2.0732 | 2.3939 | -3.0059 |
| H219 | 2.6087 | 2.0421 | -1.3514 |
| H220 | 3.8941 | -1.1830 | -1.9498 |
| H221 | 2.8836 | -1.0094 | -0.5019 |
| H222 | 2.4910 | -2.2431 | -1.7149 |
| Si223 | -0.9824 | 1.5085 | -2.4432 |
| H224 | -0.5005 | 2.6628 | -1.6021 |
| C225 | -0.7010 | 1.9767 | -4.2397 |
| C226 | -2.8314 | 1.3492 | -2.1581 |
| H227 | -1.2967 | 2.8529 | -4.4899 |
| H228 | 0.3516 | 2.2026 | -4.4013 |
| H229 | -0.9923 | 1.1505 | -4.8860 |
| H230 | -3.3359 | 2.2522 | -2.4974 |
| H231 | -3.2175 | 0.4950 | -2.7117 |
| H232 | -3.0299 | 1.2065 | -1.0973 |
| Si233 | -0.8599 | -1.5711 | -2.4723 |
| H234 | -1.4009 | -1.2794 | -3.8486 |
| C235 | 0.2913 | -3.0460 | -2.6307 |
| C236 | -2.3168 | -2.0729 | -1.3992 |
| H237 | -0.2688 | -3.9163 | -2.9683 |
| H238 | 1.0765 | -2.8250 | -3.3517 |
| H239 | 0.7443 | -3.2654 | -1.6654 |
| H240 | -2.7653 | -2.9848 | -1.7896 |
| H241 | -1.9799 | -2.2490 | -0.3791 |
| H242 | -3.0632 | -1.2805 | -1.3970 |
| H243 | 0.2348 | -1.3963 | 0.4871 |
| H244 | 1.0918 | 0.9015 | 0.4871 |
| H245 | -1.3266 | 0.4948 | 0.4871 |
| ‘ccc’ |  |  |  |
| C246 | 0.0000 | 0.0000 | -1.8926 |
| Si247 | 0.0000 | 0.0000 | 0.0000 |
| Si248 | 1.8002 | 0.0000 | -2.4432 |
| H249 | 2.2838 | 1.4226 | -2.3235 |
| C250 | 2.9177 | -1.0575 | -1.3669 |
| C251 | 2.0415 | -0.5185 | -4.2317 |
| H252 | 3.9394 | -1.0122 | -1.7401 |
| H253 | 2.8956 | -0.6919 | -0.3417 |
| H254 | 2.5765 | -2.0911 | -1.3849 |
| H255 | 3.1007 | -0.4963 | -4.4823 |
| H256 | 1.6612 | -1.5281 | -4.3773 |
| H257 | 1.5047 | 0.1635 | -4.8889 |
| Si258 | -0.8436 | -1.5903 | -2.4432 |
| H259 | 0.1865 | -2.6842 | -2.3235 |
| C260 | -2.3015 | -2.0819 | -1.3669 |
| C261 | -1.4148 | -1.5604 | -4.2317 |
| H262 | -2.7403 | -3.0057 | -1.7401 |
| H263 | -1.9682 | -2.2336 | -0.3417 |
| H264 | -3.0547 | -1.2961 | -1.3849 |
| H265 | -1.8916 | -2.5065 | -4.4823 |
| H266 | -2.1284 | -0.7513 | -4.3773 |
| H267 | -0.5608 | -1.4058 | -4.8889 |
| Si268 | -1.0095 | 1.4905 | -2.4432 |
| H269 | -2.4586 | 1.0932 | -2.3235 |
| C270 | -0.7606 | 3.0088 | -1.3669 |
| C271 | -0.7154 | 1.9811 | -4.2317 |
| H272 | -1.3710 | 3.8294 | -1.7401 |
| H273 | -1.0508 | 2.7855 | -0.3417 |
| H274 | 0.2866 | 3.3058 | -1.3849 |
| H275 | -1.3277 | 2.8456 | -4.4823 |
| H276 | 0.3338 | 2.2323 | -4.3773 |
| H277 | -0.9791 | 1.1542 | -4.8889 |
| H278 | 0.2348 | -1.3963 | 0.4871 |
| H279 | 1.0918 | 0.9015 | 0.4871 |
| H280 | -1.3266 | 0.4948 | 0.4871 |
| ‘bbb’ |  |  |  |
| C281 | 0.0000 | 0.0000 | -1.8926 |
| Si282 | 0.0000 | 0.0000 | 0.0000 |
| Si283 | 1.8136 | 0.0000 | -2.3974 |
| H284 | 2.5051 | -1.0006 | -1.5071 |
| C285 | 2.1023 | -0.5441 | -4.1712 |
| C286 | 2.6674 | 1.6526 | -2.1413 |
| H287 | 3.1674 | -0.5208 | -4.3952 |
| H288 | 1.7301 | -1.5575 | -4.3112 |
| H289 | 1.5795 | 0.1255 | -4.8520 |
| H290 | 3.7083 | 1.5819 | -2.4522 |
| H291 | 2.1698 | 2.4201 | -2.7316 |
| H292 | 2.6270 | 1.9292 | -1.0891 |
| Si293 | -0.8503 | -1.6019 | -2.3974 |
| H294 | -2.0584 | -1.7435 | -1.5071 |
| C295 | -1.4663 | -1.6018 | -4.1712 |
| C296 | 0.2090 | -3.1309 | -2.1413 |
| H297 | -1.9451 | -2.5535 | -4.3952 |
| H298 | -2.1869 | -0.7979 | -4.3112 |
| H299 | -0.6297 | -1.4540 | -4.8520 |
| H300 | -0.3415 | -4.0171 | -2.4522 |
| H301 | 1.1202 | -3.0512 | -2.7316 |
| H302 | 0.4723 | -3.2249 | -1.0891 |
| Si303 | -1.0162 | 1.5021 | -2.3974 |
| H304 | -0.5749 | 2.6356 | -1.5071 |
| C305 | -0.7273 | 2.0462 | -4.1712 |
| C306 | -2.8634 | 1.2833 | -2.1413 |
| H307 | -1.3434 | 2.9153 | -4.3952 |
| H308 | 0.3206 | 2.3057 | -4.3112 |
| H309 | -0.9890 | 1.2380 | -4.8520 |
| H310 | -3.3881 | 2.1851 | -2.4522 |
| H311 | -3.2202 | 0.4411 | -2.7316 |
| H312 | -3.0699 | 1.0948 | -1.0891 |
| H313 | 0.2348 | -1.3963 | 0.4871 |
| H314 | 1.0918 | 0.9015 | 0.4871 |
| H315 | -1.3266 | 0.4948 | 0.4871 |
| ‘cca’ |  |  |  |
| C316 | 0.0000 | 0.0000 | -1.8926 |
| Si317 | 0.0000 | 0.0000 | 0.0000 |
| Si318 | -0.7816 | -1.6216 | -2.4432 |
| H319 | 0.2581 | -2.6918 | -2.2289 |
| C320 | -2.2928 | -2.1087 | -1.4409 |
| C321 | -1.2448 | -1.6557 | -4.2626 |
| H322 | -2.6925 | -3.0513 | -1.8109 |
| H323 | -2.0191 | -2.2236 | -0.3935 |
| H324 | -3.0569 | -1.3382 | -1.5278 |
| H325 | -1.6894 | -2.6177 | -4.5118 |
| H326 | -1.9623 | -0.8650 | -4.4752 |
| H327 | -0.3557 | -1.5046 | -4.8722 |
| Si328 | -1.0662 | 1.4505 | -2.4432 |
| H329 | -2.4989 | 0.9969 | -2.3252 |
| C330 | -0.8777 | 2.9765 | -1.3656 |
| C331 | -0.7898 | 1.9534 | -4.2311 |
| H332 | -1.5192 | 3.7729 | -1.7389 |
| H333 | -1.1600 | 2.7413 | -0.3408 |
| H334 | 0.1571 | 3.3141 | -1.3824 |
| H335 | -1.4351 | 2.7936 | -4.4817 |
| H336 | 0.2489 | 2.2454 | -4.3755 |
| H337 | -1.0205 | 1.1173 | -4.8891 |
| Si338 | 1.7910 | 0.0000 | -2.4723 |
| H339 | 1.7691 | -0.3892 | -3.9284 |
| C340 | 2.6195 | 1.6813 | -2.3607 |
| C341 | 2.8719 | -1.2502 | -1.5809 |
| H342 | 3.6481 | 1.6094 | -2.7098 |
| H343 | 2.0821 | 2.3988 | -2.9784 |
| H344 | 2.6162 | 2.0261 | -1.3281 |
| H345 | 3.8897 | -1.1967 | -1.9635 |
| H346 | 2.8798 | -1.0360 | -0.5136 |
| H347 | 2.4827 | -2.2543 | -1.7407 |
| H348 | 0.2348 | -1.3963 | 0.4871 |
| H349 | 1.0918 | 0.9015 | 0.4871 |
| H350 | -1.3266 | 0.4948 | 0.4871 |
| ‘ccb’ |  |  |  |
| C351 | 0.0000 | 0.0000 | -1.8926 |
| Si352 | 0.0000 | 0.0000 | 0.0000 |
| Si353 | -0.7781 | -1.6233 | -2.4432 |
| H354 | -1.9394 | -1.8768 | -1.5162 |
| C355 | -1.4642 | -1.5760 | -4.1905 |
| C356 | 0.3754 | -3.0982 | -2.3025 |
| H357 | -1.8971 | -2.5425 | -4.4428 |
| H358 | -2.2341 | -0.8098 | -4.2636 |
| H359 | -0.6654 | -1.3479 | -4.8941 |
| H360 | -0.1363 | -3.9995 | -2.6356 |
| H361 | 1.2561 | -2.9379 | -2.9220 |
| H362 | 0.6858 | -3.2259 | -1.2669 |
| Si363 | -1.0694 | 1.4482 | -2.4432 |
| H364 | -2.5017 | 1.0053 | -2.2875 |
| C365 | -0.8489 | 2.9898 | -1.3942 |
| C366 | -0.8285 | 1.9212 | -4.2443 |
| H367 | -1.4937 | 3.7841 | -1.7662 |
| H368 | -1.1105 | 2.7725 | -0.3600 |
| H369 | 0.1873 | 3.3207 | -1.4384 |
| H370 | -1.4741 | 2.7613 | -4.4944 |
| H371 | 0.2086 | 2.2045 | -4.4155 |
| H372 | -1.0780 | 1.0763 | -4.8839 |
| Si373 | 1.8136 | 0.0000 | -2.3974 |
| H374 | 2.2953 | 1.4217 | -2.2608 |
| C375 | 2.9025 | -1.0621 | -1.2966 |
| C376 | 2.0996 | -0.5128 | -4.1809 |
| H377 | 3.9333 | -1.0167 | -1.6437 |
| H378 | 2.8547 | -0.7000 | -0.2711 |
| H379 | 2.5608 | -2.0954 | -1.3268 |
| H380 | 3.1648 | -0.4909 | -4.4045 |
| H381 | 1.7222 | -1.5216 | -4.3395 |
| H382 | 1.5803 | 0.1719 | -4.8492 |
| H383 | 0.2348 | -1.3963 | 0.4871 |
| H384 | 1.0918 | 0.9015 | 0.4871 |
| H385 | -1.3266 | 0.4948 | 0.4871 |
